## 1 Proteomic prediction of common and rare diseases

2

3 Julia Carrasco-Zanini PhD<sup>1,2,3,4\*\*</sup>, Maik Pietzner PhD<sup>2,4,3\*</sup>, Jonathan Davitte PhD<sup>5\*</sup>, Praveen  
4 Surendran PhD<sup>1</sup>, Damien C. Croteau-Chonka PhD<sup>6</sup>, Chloe Robins PhD<sup>5</sup>, Ana Torralbo  
5 PhD<sup>7</sup>, Christopher Tomlinson MBBS<sup>7,8</sup>, Natalie Fitzpatrick PhD<sup>7</sup>, Cai Ytsma M.Sc.<sup>7</sup>, Tokuwa  
6 Kanno PhD<sup>5</sup>, Stephan Gade PhD<sup>9</sup>, Daniel Freitag PhD<sup>1</sup>, Frederik Ziebell PhD<sup>9</sup>, Spiros Denaxas  
7 PhD<sup>7,8,10,11</sup>, Joanna C. Betts PhD<sup>1</sup>, Nicholas J. Wareham FMedSci<sup>2\*</sup>, Harry Hemingway  
8 FMedSci<sup>7,8,10\*</sup>, Robert A. Scott PhD<sup>1\*</sup>, Claudia Langenberg FFPH<sup>2,3,4\*\*</sup>

9 <sup>1</sup>Genomic Sciences, GSK Research and Development, Stevenage, UK,

10 <sup>2</sup>MRC Epidemiology Unit, School of Clinical Medicine, Institute of Metabolic Science,  
11 University of Cambridge, Cambridge, UK,

12 <sup>3</sup>Precision Healthcare University Research Institute, Queen Mary University of London,  
13 London, UK,

14 <sup>4</sup>Computational Medicine, Berlin Institute of Health at Charité-Universitätsmedizin Berlin,  
15 Berlin, Germany,

16 <sup>5</sup>Genomic Sciences, GSK Research and Development, Collegeville, PA, USA,

17 <sup>6</sup>Genomic Sciences, GSK Research and Development, Cambridge, MA, USA,

18 <sup>7</sup>Institute of Health Informatics, University College London, London, UK,

19 <sup>8</sup>National Institute for Health Research, Biomedical Research Centre, University College  
20 London Hospitals NHS Trust, London, UK,

21 <sup>9</sup>Genomic Sciences, Cellzome GmbH, GSK Research and Development, Heidelberg,  
22 Germany,

23 <sup>10</sup>Health Data Research UK

24 <sup>11</sup>British Heart Foundation Data Science Centre, London, UK

25

26

27

28

29 \* These authors contributed equally

30 # Correspondence to: Julia Carrasco-Zanini ([j.carrasco-zanini-sanchez@qmul.ac.uk](mailto:j.carrasco-zanini-sanchez@qmul.ac.uk)) & Claudia

31 Langenberg ([claudia.langenberg@qmul.ac.uk](mailto:claudia.langenberg@qmul.ac.uk)) at the Precision Healthcare Research Institute, QMUL

32 **Abstract**

33 **Background:** For many diseases there are delays in diagnosis due to a lack of objective biomarkers for  
34 disease onset. Whether measuring thousands of proteins offers predictive information across a wide  
35 range of diseases is unknown.

36 **Methods:** In 41,931 individuals from the UK Biobank Pharma Proteomics Project (UKB-PPP), we  
37 integrated ~3000 plasma proteins with clinical information to derive sparse prediction models for the  
38 10-year incidence of 218 common and rare diseases (81 – 6038 cases). We compared prediction  
39 models based on proteins with a) basic clinical information alone, b) basic clinical information + 37  
40 clinical biomarkers, and c) genome-wide polygenic risk scores.

41 **Results:** For 67 pathologically diverse diseases, a model including as few as 5 to 20 proteins was  
42 superior to clinical models (median delta C-index = 0.07; range = 0.02 – 0.31) and to clinical models  
43 with biomarkers for 52 diseases. In multiple myeloma, for example, a set of 5 proteins significantly  
44 improved prediction over basic clinical information (delta C-index = 0.25 (95% confidence interval 0.20  
45 – 0.29)). At a 5% false positive rate (FPR), proteomic prediction (5 proteins) identified individuals at  
46 high risk of multiple myeloma (detection rate (DR) = 50%), non-Hodgkin lymphoma (DR = 55%) and  
47 motor neuron disease (DR = 29%). At a 20% FPR, proteomic prediction identified individuals at high-  
48 risk for pulmonary fibrosis (DR= 80%) and dilated cardiomyopathy (DR = 75%).

49 **Conclusions:** Sparse plasma protein signatures offer novel, clinically useful prediction of common and  
50 rare diseases, through disease-specific proteins and protein predictors shared across multiple diseases.

51

52 **(Funded by Medical Research Council , NIHR, Wellcome Trust.)**

53

54

55

## 56 Introduction

57 A central challenge in precision medicine is the development of clinically useful tools for identifying  
58 individuals at high risk which may enable timely diagnosis, early initiation of treatment and improved  
59 patient outcomes<sup>1</sup>. Clinically recommended tools for predicting the risk of onset of diseases are widely  
60 used for heart attack and stroke (e.g., the AHA / ACC 10-year risk equation)<sup>2</sup> but for very few other  
61 diseases. Across diverse diseases pathologies, diagnostic delays of months or years are reported from  
62 the initial onset of symptoms<sup>3-5</sup>. Over the last decades, single plasma proteins have become  
63 established as specific, diagnostic assays for a small number of diseases including BNP for heart failure,  
64 troponins for acute coronary syndromes and UCH-L1 and GFAP in traumatic brain injury<sup>6</sup>.

65  
66 Plasma proteomics allows estimation of thousands of proteins and agnostic discovery studies not  
67 confined to a single disease of interest and represents a promising technology to accelerate progress  
68 towards this challenge. Plasma proteomic signatures capture health behaviours and current health  
69 status<sup>7</sup>, and may integrate the risk of “static” genetic<sup>8,9</sup> and dynamic environmental determinants of  
70 disease. Translatable, parsimonious models have been described. For example, a sparse protein  
71 signature, containing as few as three proteins, improved identification of a high-risk group for diabetes  
72 which is currently missed by screening strategies.<sup>10</sup>

73  
74 Whether plasma proteomics may offer clinically useful predictive or mechanistic information across a  
75 wide range of diseases, alone or in combination, is unknown for several reasons. First, previous  
76 proteomic studies have had too few participants to evaluate rare and common diseases. Secondly,  
77 previous studies of disease onset have focussed on a narrow set of common diseases<sup>7,11-13</sup>, rather than  
78 taking an agnostic discovery approach. Thirdly, previous studies have not reported screening metrics  
79 compared to clinical models (without proteins) which may inform integration into health records and  
80 translational evaluation.

81  
82 We used data from the UK Biobank Pharma Proteomics Project (UKB-PPP), the largest proteomic  
83 experiment to date, to address the following objectives (i) to systematically interrogate the 10 year  
84 predictive potential of the measurable plasma proteome across 218 pathologically diverse diseases,  
85 over and above models based on information obtained in usual care (without and with clinical  
86 biomarkers) and polygenic risk scores (ii) to identify disease-specific protein predictors pointing to  
87 underlying aetiological mechanisms, compared to those shared across diseases (iii) to determine  
88 whether the screening metrics of proteomic signatures for diseases meet, or exceed, those for blood  
89 biomarkers used in current clinical practice.

## 90 **Methods**

### 91 ***Study design***

92 We carried out a cohort study in the UKB-PPP to develop, validate and compare predictive models with  
93 and without proteins. UKB is a highly characterised longitudinal cohort of 500 000 adults. Individuals  
94 were excluded if they had missing data for age, sex and body mass index (BMI) or failed quality control  
95 (QC) criteria for proteomic measurements. The human biological samples were sourced ethically, and  
96 their research use was in accordance with the terms of the informed consent and under an IRB/EC  
97 approved protocol.

### 98 ***Clinical risk information***

99 Clinical risk information (without blood biomarkers) recommended as part of usual primary care, was  
100 obtained from UKB health questionnaires. This included: age at baseline, self-reported ethnicity,  
101 smoking status, alcohol consumption, paternal or maternal history for 15 individual diseases available  
102 (data-field IDs 20197 and 20110, **Table S1**), and measured BMI. For clinical risk information with blood  
103 biomarkers, we included 37 of the most widely performed blood tests (16 of these are based on  
104 proteins) which were assessed in all UKB participants (UKB Category 17518, 100081). Quality control  
105 of these 'clinical biomarkers' was done based on methods previously described<sup>14,15</sup> and imputation was  
106 done using the missForest R package<sup>16</sup> including additional information on age and sex.

### 107 ***Proteomic profiling***

108 Proteomic profiling was performed in EDTA-plasma samples from 54,893 UKB participants obtained at  
109 baseline as part of the UK Biobank Pharma Proteomics Project (UKB-PPP), using the Olink Explore 1536  
110 and Expansion platforms, which captured 2923 unique proteins targeted by 2941 assays. Assay  
111 details<sup>17,18</sup>, sample selection and handling have been previously described<sup>19</sup>. The current study is based  
112 on participants from a randomly selected subset (N = 46,750). After quality control, we imputed  
113 missing NPX (normalised protein expression) values, using the missForest R package<sup>16</sup>, for all  
114 individuals who met the QC and inclusion criteria and had no more than 50% of missing values across  
115 all proteins, **Table S1-2, Supplementary Appendix**). Imputation was done per Olink panel, including  
116 additional information on age and sex.

### 117 ***Incident disease definitions***

118 We developed prediction models for 218 diseases, with more than 80 incident cases within 10 years  
119 of follow-up (censoring date was the 31<sup>st</sup> of December 2020 or death date if this occurred first) in the

120 random subset (N = 41,931, 193 diseases), or by including incident cases within the “consortium-  
121 selected” subset (25 diseases) (**Table S1**). The 218 diseases include common and rare diseases, and  
122 diseases associated with high morbidity, high mortality, or both. Disease definitions were based on  
123 validated phenotypes described by Kuan *et al.*<sup>20</sup> by integrating data from primary care, hospital episode  
124 statistics, cancer and death registries and from UKB health questionnaires including self-reported  
125 illnesses. We excluded prevalent cases (first occurrence prior to or up to the baseline assessment visit)  
126 or incident cases recorded within the first 6 months of follow-up.

### 127 **Statistical analyses**

128 We adapted a 3-step machine learning framework including (1) feature selection, (2) hyperparameter  
129 tuning and optimization, and (3) validation. Individuals were divided: 50% for feature selection, 25%  
130 for model optimization (training), and 25% for validation, for diseases with more than 800 cases;  
131 otherwise, into a 70% feature selection and model optimization set, and 30% for validation. Validation  
132 sets included non-overlapping individuals completely blinded to previous model development stages.

133 We performed feature selection among 2941 protein targets, or among the 37 clinical biomarkers by  
134 least absolute shrinkage and selection operator (LASSO) regression over 200 subsamples of the feature  
135 selection set. In each iteration, we ran 5-fold cross-validation over 3 repeats using a grid search to tune  
136 the hyperparameter lambda. We used the ROSE R package<sup>21</sup> to address case imbalance. Selection  
137 scores were computed as the absolute sum of weights from the model with the optimal lambda from  
138 each of the 200 iterations and were used to identify the top 20 proteins or clinical biomarkers  
139 (**Supplementary Appendix**).

140 We used regularised cox regression to derive a “benchmark” clinical model, by 5-fold cross-validation  
141 in the optimisation or training set using the features described above. We tested improvement in  
142 models by adding onto the patient information: 1) 5 – 20 proteins, 2) 5 – 20 clinical biomarkers or 3)  
143 genome-wide polygenic scores<sup>22</sup> (PGS, UKB category 301) (**Figure 1**). For these comparisons, we  
144 trained and tested models including up to 5, 10 and 20 proteins or biomarkers and kept the best  
145 performing protein signature and biomarker signature. Validation was performed in the held-out test  
146 set, where we computed the concordance index (C-index) over 1000 bootstrap samples. Significant  
147 improvements between models were considered as those for which the 95 % confidence interval (95%  
148 CI) of the differences in the bootstrap C-index distributions did not include zero.

149 The screening metrics we calculated were: detection rates (DR) and likelihood ratios (LR) in the  
150 validation set at false positive rates (FPR) ranging from 5 to 40%. The FPR was calculated as  $FPR = \text{false positives (FP)} / (\text{true negatives (TN)} + \text{FP})$ ; and detection rates were calculated as  $DR = \text{true positives} / (\text{true positives} + \text{false negatives (FN)})$

152 (TP)/ (false negatives (FN) + TP). LRs were computed as  $LR = DR / FPR$ . All analyses were performed in  
153 R software version 4.1.1.

154

## 155 **Results**

### 156 **Improvement in prediction by adding sparse protein signatures vs clinical biomarkers onto clinical** 157 **models**

158 Clinical models without blood biomarkers showed a median C-index = 0.64 (interquartile range = 0.58  
159 – 0.72), achieving the highest performance for endocrine and cardiovascular diseases (**Figure S1, Table**  
160 **S3**). For 67 rare and common diseases (**Figure S2**), addition of 5 to 20 proteins significantly improved  
161 (95% confidence intervals of improvement in C-index > 0) clinical models (median increase in C-index  
162 = 0.07, range = 0.02 – 0.31) (**Figure 2a, Table S4**). Diseases for which proteins improved clinical models  
163 included multiple myeloma (delta C-index = 0.25 (95% confidence interval 0.20 – 0.29, LR = 6.55), non-  
164 Hodgkin lymphoma (delta C-index = 0.21 (0.14 – 0.28), LR = 6.08), pulmonary fibrosis (delta C-index =  
165 0.09 (0.03 – 0.14), LR = 6.83), coeliac disease (delta C-index = 0.31 (0.21 – 0.38), LR=8.07), dilated  
166 cardiomyopathy (delta C-index = 0.17 (0.10 – 0.22), LR =6.97) and motor neuron disease (delta C-index  
167 = 0.11 (95% CI: 0.04 – 0.16), LR = 4.38) (**Figure 2a**). Across these 67 diseases, the median detection  
168 rate (at a 10% FPR,  $DR_{10}$ ) was 45.5% (range: 10.8 – 80.8 %), compared to 25% (range: 9.5 – 51.2%) for  
169 the clinical model (**Figure 2b, Table S5**). The median LR was 4.55 (range: 1.08 – 8.07) for these 67  
170 diseases, representing improvements ranging from 0.12 – 6.92 over the clinical models (**Figure 2c**). For  
171 example, applying a protein-informed test for coeliac disease (LR = 8.08) would result in detecting  
172 80.8% of cases, while retaining an acceptable proportion of 10% false-positives (**Figure S3**). Clinical  
173 models with blood biomarkers only significantly improved prediction over clinical models for 28  
174 diseases (median delta C-index = 0.08, range = 0.01 – 0.28) (**Figure 3, Table S6**). For 52 of these  
175 diseases, protein-based models achieved higher LRs (range = 0.13 – 5.17) in comparison to clinical  
176 model with blood biomarkers (**Figure S4, Table S7**). Compared to the single most informative protein,  
177 sparse protein signatures (5-20 proteins) had an average 5.4% improvement in C-index over clinical  
178 models, across diseases that achieved significant improvements. For 64% of these, performance  
179 saturation was achieved by including a maximum of 5 to 10 proteins.

180

### 181 **Proteins predicting multiple diseases**

182 The 67 prediction models with clinically relevant improvements, included a total of 501 protein targets,  
183 of which 147 were selected for 2 or more (range: 2 - 16) diseases (**Figure S5**); most of which (~89%)  
184 were selected across 2 or more clinical specialties (range: 2 - 9) (**Figure 4a**). On average, these had a  
185 relatively lower contribution for prediction of individual diseases, in comparison to highly specific

186 proteins (**Figure 4b**). Age was the major correlate of 4 out of the 5 proteins that were predictive across  
187 more than 10 diseases and smoking status was the major correlate for CXCL17 (**Figure S6**), but these  
188 proteins still provided improvements in prediction over and above these conventional risk factors.

### 189 **Proteins specifically predicting one disease**

190 We identified proteins solely and strongly predictive for only one disease (**Figure 4c, Table S8**),  
191 including TNF receptor superfamily member 17 (TNFRSF17 or B-Cell Maturation antigen), a specific  
192 predictor for multiple myeloma; and TNFRSF13B, a strong predictor of monoclonal gammopathy of  
193 undetermined significance (MGUS), a condition which precedes the development of multiple myeloma  
194 (at a rate of ~1 in 100 MGUS cases developing multiple myeloma per year<sup>23</sup>). Here, we provide evidence  
195 that increased plasma levels of these receptors (**Table S9**) are strongly predictive of future onset for  
196 these blood cancers. Previous studies have already suggested an association between plasma  
197 TNFRSF17 and progression from MGUS to multiple myeloma<sup>24</sup>. Here we identified the added value of  
198 a 5-protein protein signature, which improved discrimination by 7% over patient risk factors +  
199 TNFRSF17 alone.

### 200 **PGS compared to clinical models and protein models**

201 For 23 diseases for which PGS were available in UKB, we found that PGS significantly improved  
202 prediction over clinical models for only 7 diseases, but with clinically negligible improvements (median  
203 delta C-index = 0.03, range = 0.01 – 0.14) (**Table S10**). Proteins outperformed PGS for all of these,  
204 except for breast cancer (**Figure S7**).

### 205 **Screening metrics for protein and clinical models**

206 We observed consistently superior screening metrics across all conditions for a wide range of FPRs  
207 (5%-40%; **Figure 5**). At a 20% FPR, proteomic prediction identified individuals at high-risk for  
208 pulmonary fibrosis (including CA4, CEACAM6, GDF15, SFTPD and WFDC2; DR=80%) and dilated  
209 cardiomyopathy (including HRC, TNNT3, TPBGL, NPPB, NTproBNP; DR=75%). At a low FPR (5%),  
210 proteomic prediction identified individuals at high risk for multiple myeloma (FCRLB, QPCT, SLAMF7,  
211 TNFRSF17, TNFSF13B; DR = 50%), non-Hodgkin lymphoma (BCL2, CXCL13, IL10, PDCD1, SCG3; DR =  
212 55%) and motor neuron disease (including CST5, EGFLAM, NEFL, PODXL2 and TMED10; DR = 29%).

213 In sensitivity analyses we found that adding a larger set of proteins included in Olink's Explore  
214 Expansion panels (**Supplementary appendix**) did not generally improve model performance compared  
215 to the first release of 1463 proteins (**Figure S8, Table S4**). However, improvements for selected diseases  
216 were obtained by including a specific predictive biomarker (only captured in the Expansion panels),  
217 such as TCN1 (a vitamin B12 binding protein) for vitamin B12 deficiency anaemia, KLK3 (prostate-



218 specific antigen) for prostate cancer or, F10 (a coagulation factor that converts prothrombin into  
219 thrombin) and PROS1 (an anticoagulant protein) for thrombophilia (**Figure S8**). Protein-based models  
220 trained on 10-year incidence performed equally well when restricting the follow-up time to 5 years  
221 (Pearson  $r = 0.96$ , **Figure S9a**), although patient information models appeared to have systematically  
222 lower performances indices up to 5-years (Pearson  $r = 0.88$ , **Figure S9b**).

223

## 224 **Discussion**

225 We demonstrate the potential of sparse protein signatures to improve the prediction of disease onset  
226 across common and rare diseases. By integrating ~3000 broad capture plasma proteins with EHRs, we  
227 showed that for 52 of 218 diseases studied, adding proteins was the single best prediction model, not  
228 only superior to commonly used patient characteristics, but also to a large array of biomarkers in  
229 clinical use and PGS (where available). Broad-capture proteomic technologies offer for many diseases  
230 new possibilities to address delays in diagnosis, the first blood-based biomarkers and the first evidence  
231 of clinically useful prediction models compared to current practice (**Table S11**). Plasma proteomic  
232 signatures may inform the need for, and design of, therapeutic clinical trials.

233 The wide spectrum of diseases that we studied enabled discovery of disease-proteomic signatures  
234 with the strongest screening metrics. The proteomic signatures that we report have screening metrics  
235 which were comparable to, or exceeded, those of blood tests currently used as diagnostic tests (for  
236 other diseases). Previous studies in a small number of diseases have investigated the predictive<sup>7,11-13</sup>  
237 or prognostic<sup>25</sup> potential of the circulating proteome. We found that for almost two-thirds (61%) of the  
238 superior protein models, a positive test, i.e., a predicted risk above the risk cut-off, translated into a  
239 four-fold increased risk of developing the disease compared to a negative one. Specifically, for 14  
240 diseases, the LR achieved by protein-based models was higher than for a signature including prostate  
241 specific antigen (KLK3) for prostate cancer, which is used in currently implemented screening  
242 programs<sup>26</sup>. Sparse protein signatures (5-20 proteins) offer the opportunity to assess a limited set of  
243 proteins at a cost much below a discovery proteomic assay. The fact, that we identified strong  
244 predictive signatures in the non-fasting UKB samples further suggested feasibility of measurement in  
245 clinical practice.

246 We identified specific and strongly predictive proteins, pointing to underlying pathways conferring  
247 disease risk. Here we show that up to 10 years prior to diagnosis, higher plasma levels of TNFRSF17  
248 and TNFRSF13B, receptors for BAFF and APRIL, were strong, specific predictors of increased risk of  
249 multiple myeloma and MGUS, respectively. These signalling pathways have been shown to promote  
250 multiple myeloma growth<sup>27,28</sup>. In turn, decreased plasma TNFSF13B, was further shown to be

251 predictive of higher risk for multiple myeloma. Anti-TNFRSF17 agents, including antibody-drug  
252 conjugates (ADCs), T-cell engagers bispecific antibodies and cellular therapy with chimeric antigen  
253 receptor T cells (CAR-T), are approved for the treatment of refractory multiple myeloma<sup>29-33</sup>. Clinical  
254 trials exploring earlier implementation have started providing evidence for the safety and effectiveness  
255 of CAR-T cells in early lines of treatment<sup>34</sup>. Our results demonstrated the potential for implementation  
256 of proteomic screening, in a preventative manner even years before the onset of overt multiple  
257 myeloma, to identify the subgroup of individuals at highest risk, and highlight the possibility to test  
258 whether they represent those who would eventually benefit the most from anti-TNFRSF17 as earlier  
259 lines of treatment. Pulmonary fibrosis may be delayed due to misdiagnosis of other common  
260 respiratory or cardiovascular diseases<sup>35</sup>. The proteomic signature should be evaluated to identify who  
261 might benefit from enhanced surveillance through lung function tests and lung imaging, potentially  
262 enabling early treatment to maximise preservation of lung function<sup>36</sup>. For dilated cardiomyopathy,  
263 proteomic signatures could be evaluated for their potential to inform ECG and echo surveillance in  
264 people without a known genetic cause (up to 60% of cases<sup>37,38</sup>).

265 We found proteins predictive across multiple diseases and clinical specialties, consistent with shared  
266 aetiologies, including adaptations to ageing. Gastrin, for example, is well known for its role in  
267 production of hydrochloric acid, gastric motility and associations with gastrointestinal cancers and  
268 digestive system diseases<sup>39</sup>. However, our results highlighted associations with a wider range of  
269 diseases, including vitamin deficiencies, osteoporosis, infections and acute kidney injury. Proof-of-  
270 principle studies suggested that a single “omics” domain may predict risk of onset across multiple  
271 diseases<sup>40</sup>. Therefore, our results point to the potential for leveraging pleiotropic proteins to develop  
272 a customized, small signature for prediction across multiple diseases.

273 Our study has important limitations. Firstly, our results require validation in external studies, in  
274 ethnically diverse populations and in cohorts with differing pre-test probabilities of disease (UKB has  
275 a healthy participant effect<sup>41</sup>). Secondly, although we report the largest proteomic experiment to date,  
276 larger sample sizes are required to estimate detection rates for rarer diseases, and over shorter  
277 clinically relevant time frames (e.g., 1-5 years). Thirdly, evaluations against clinical diagnostic markers  
278 not available in UK Biobank are required including M-protein for multiple myeloma, and IgA/ IgG  
279 antibodies and anti-transglutaminase for coeliac disease. Fourthly, clinical translation will require  
280 development and validation of absolute quantification protein assays as opposed to the relative  
281 quantification provided by current proteomic platforms.

282 In conclusion, we demonstrated that sparse plasma protein signatures when integrated with electronic  
283 health records may offer novel, clinically useful prediction of common and rare diseases, through  
284 disease-specific proteins and protein predictors shared across multiple diseases.

---

285

286

287

288

289



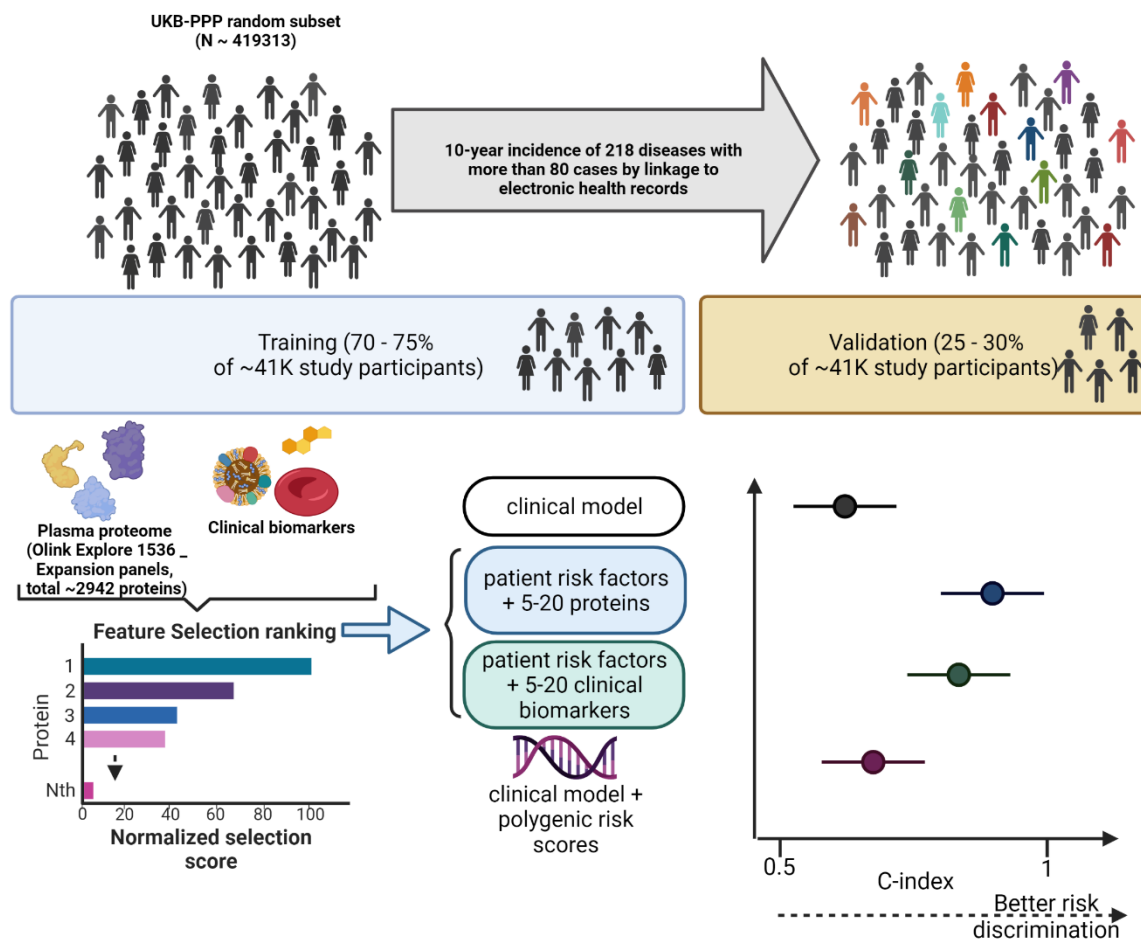

291

292 **Figure 1. Study design.** This cohort study is based on a random subset of UKB-PPP individuals (N = 41,931). All  
 293 individuals were divided into training (including feature selection and optimisation steps) and validation sets to  
 294 develop sparse protein-based predictors (including 5-20 proteins from the Olink Explore 1536 + Expansion  
 295 panels) for 218 diseases defined using data from the UKB health-questionnaire, primary care, hospital episode  
 296 statistics, cancer and death registries. Performance of protein-signatures was compared to clinical models,  
 297 clinical biomarkers and genome-wide polygenic risk scores (PGS). Further details of methods are in the  
 298 (Supplementary Appendix).

299

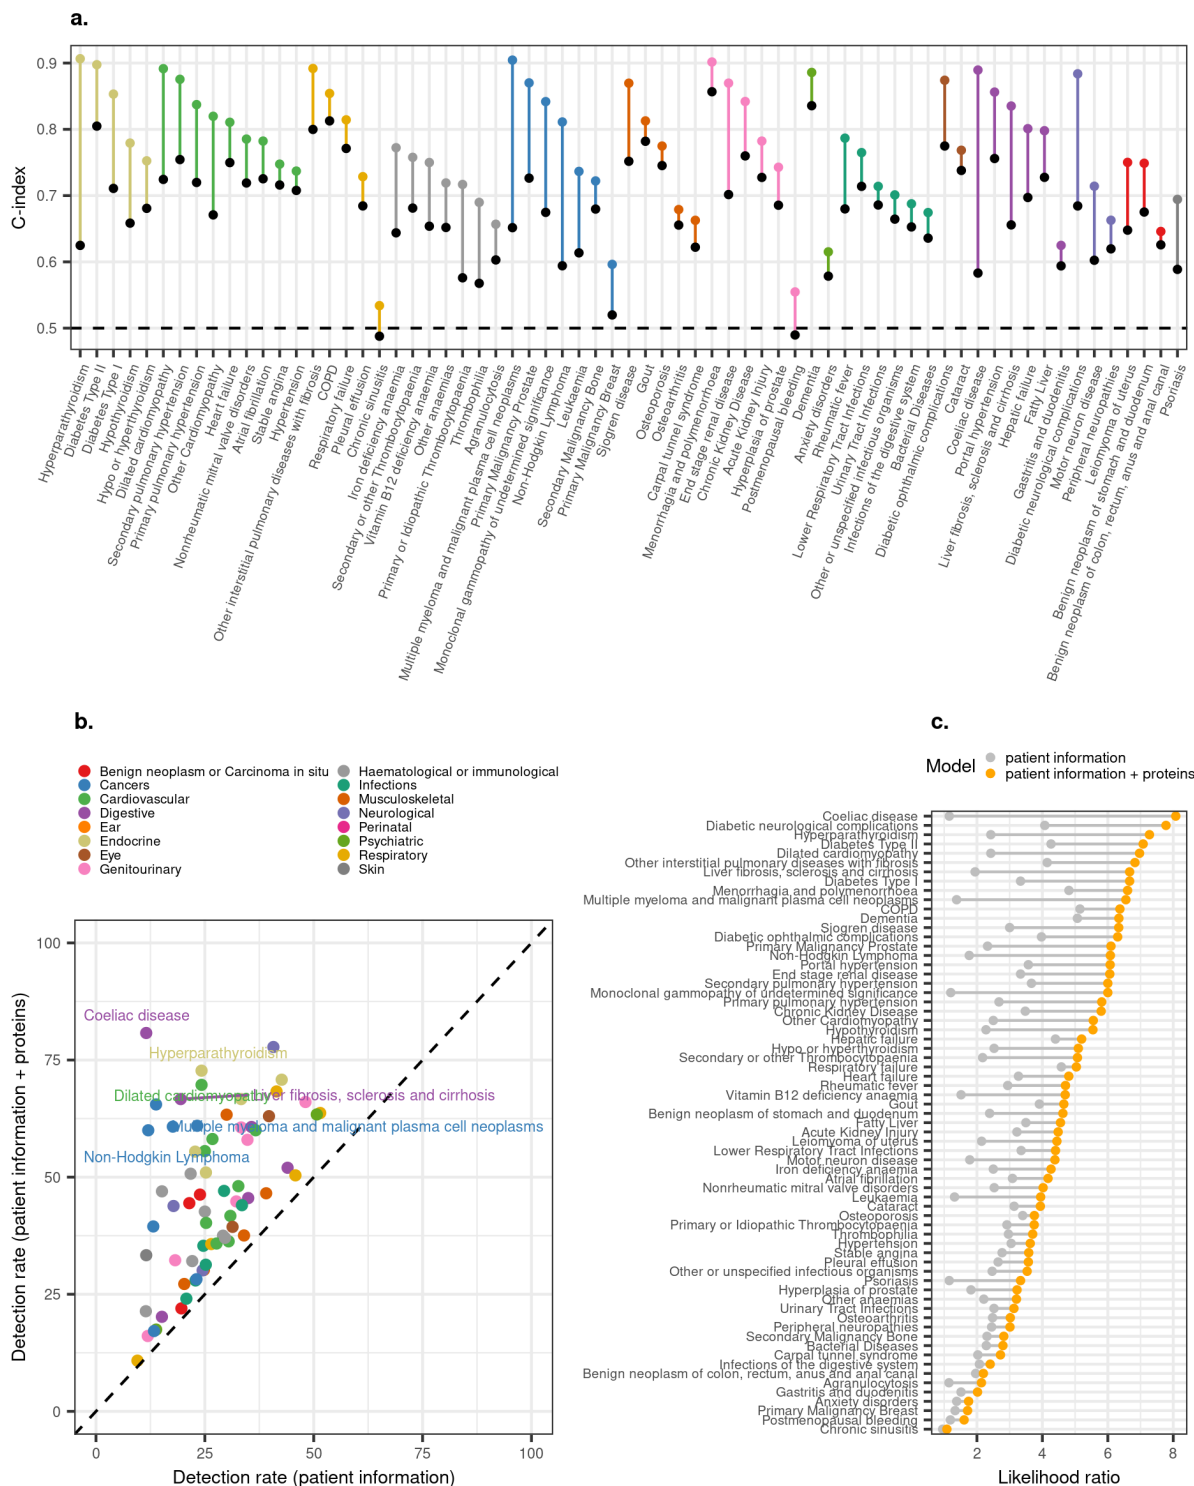

300

301 **Figure 2. Improvement in predictive performance by addition of proteins onto basic patient risk factors for 67**  
 302 **incident diseases. a,** Improvement in C-index by the addition of 5 – 20 proteins (coloured dots) over the  
 303 benchmark patient-information model (black dots). **b,** Comparison between detection rates (at a 10% false  
 304 positive rate) achieved by protein-based and patient-information model. **c,** Improvement in likelihood ratios by  
 305 the addition of 5 – 20 proteins (orange) over the benchmark clinical model (grey).

306

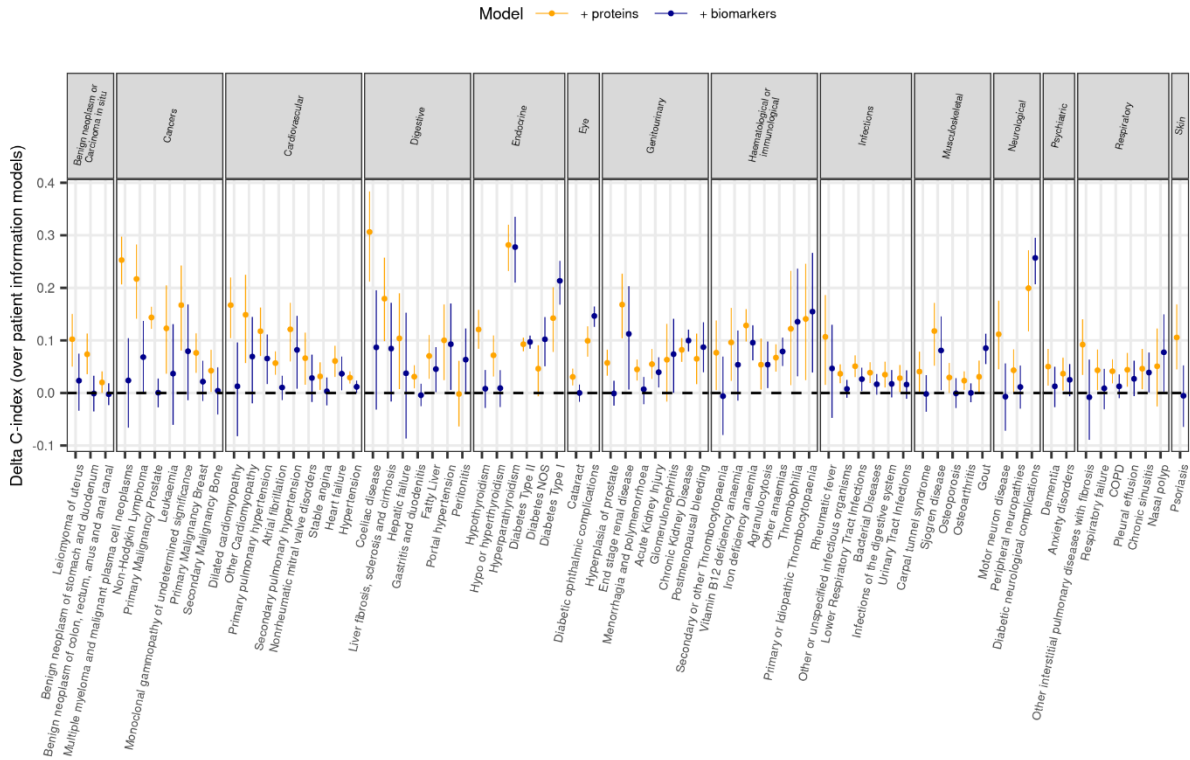

307

308 **Figure 3. Comparison of predictive performance between proteins-based (patient information + proteins) and**  
 309 **biomarker-based (patient information + biomarkers) models. a, Comparison of C-index by the addition of**  
 310 **protein-based (coloured dots) or biomarker-based models (black dots) onto patient risk factors. We only show**  
 311 **those diseases for which C-index was significantly improved by addition of either proteins or clinical biomarkers**  
 312 **onto the patient risk factors.**

313

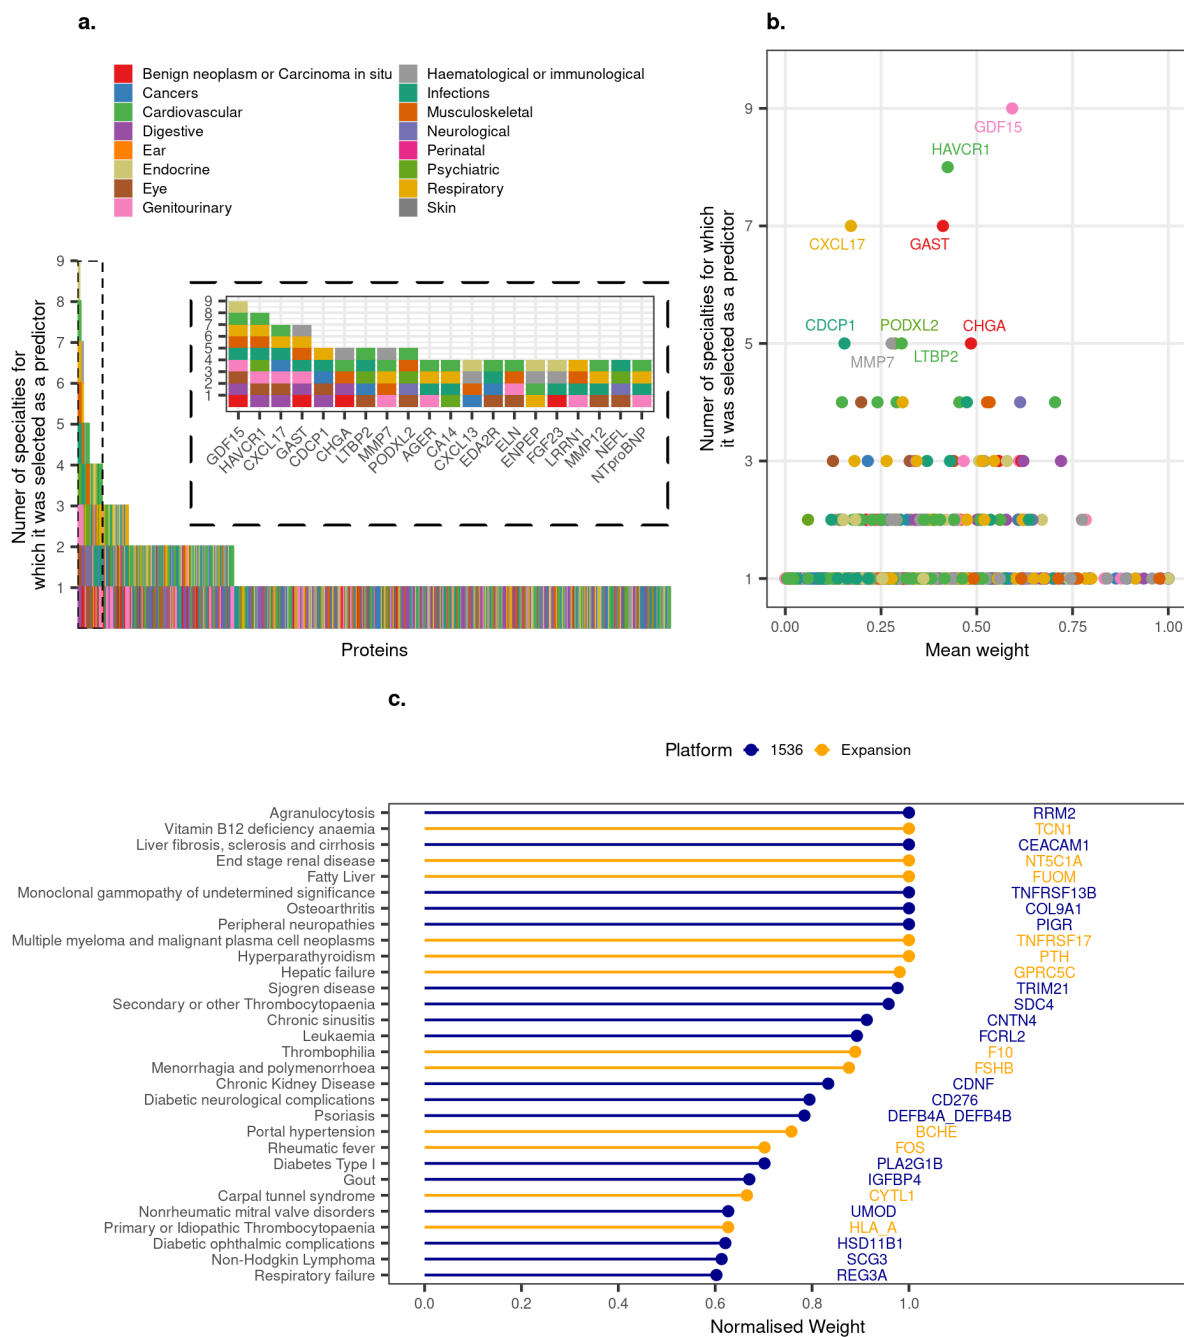

314

315 **Figure 4. Disease specificity of predictor proteins.** **a**, Number of disease groups for which a protein was selected  
 316 as a predictor across the 88 diseases. These were diseases for which the C-index was significantly improved or  
 317 improved by more than 0.4 over the patient information model. **b**, Average contribution of proteins across  
 318 diseases. Average weights (normalised to the top predictor) from the optimised prediction models for each  
 319 protein, across diseases for which it was selected as a predictor (out of the 88 improved diseases). **c**, Disease-  
 320 specific proteins are shown as those selected for only one disease with a normalised weight > 0.6.

321

322



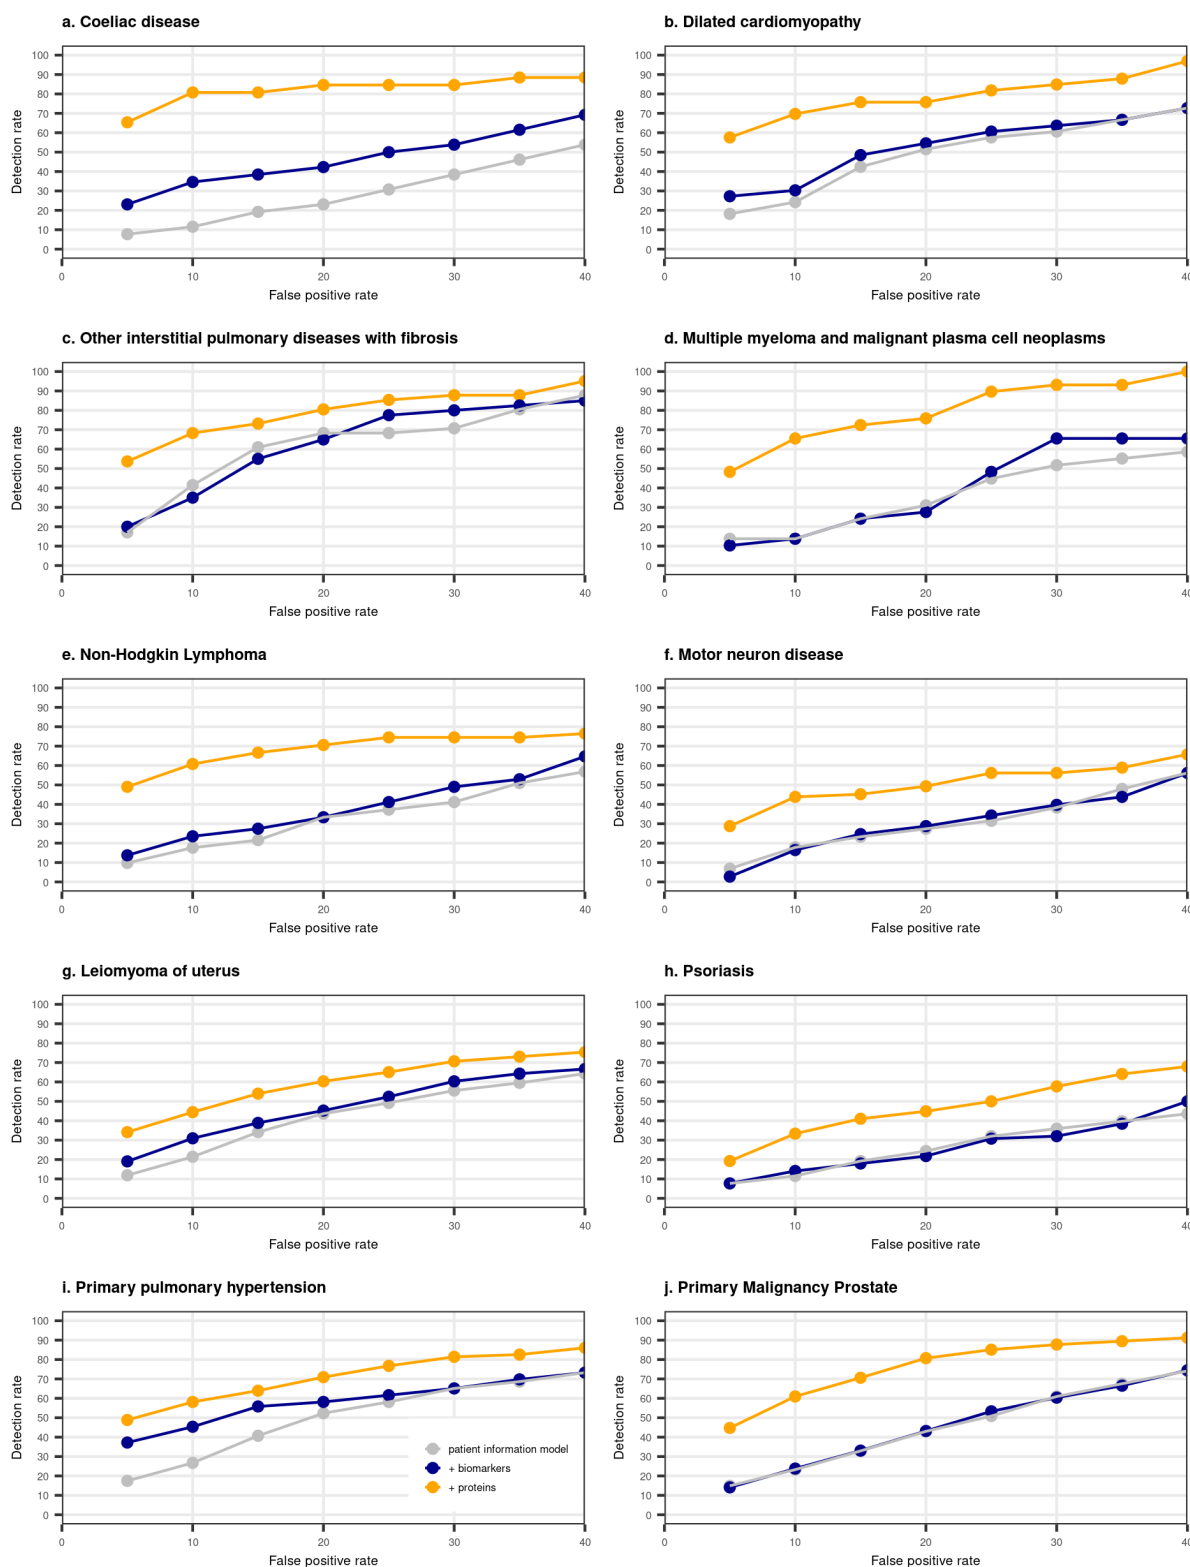

323

324 **Figure 5. Detection rate curves.** Detection rates across different false positive rate thresholds for  
 325 selected examples identified as those most likely to benefit from proteomic prediction over patient  
 326 risk factors, clinical biomarkers and PGS. Coeliac disease (TGM2, NOS2, ITGB7, CD160, PPP1R14D,  
 327 RBP2, CCL25, MLN, FGF19, HMOX1, CEND1, MILR1, CDH2, CKMT1A\_CKMT1B, CPA2, GTF2IRD1,  
 328 SEPTIN3, BCL2L15, FABP2, HSD17B14). Dilated Cardiomyopathy (HRC, TNNI3, TPBGL, NPPB,  
 329 NTproBNP). Other interstitial pulmonary disease with fibrosis (CA4, CEACAM6, GDF15, SFTPD and

330 WFDC2). Multiple myeloma and malignant cell neoplasms (FCRLB, QPCT, SLAMF7, TNFRSF17,  
331 TNFSF13B). Non-Hodgkin Lymphoma (BCL2, CXCL13, IL10, PDCD1, SCG3). Motor neuron disease (CST5,  
332 EGFLAM, NEFL, PODXL2 and TMED10). Leiomyoma of uterus (BMP4, CDH3, CHRDL2, DNPEP, FGF23,  
333 GFRAL, LEFTY2, PAEP, SEZ6L2, TSPAN1). Psoriasis (DEFB4A\_DEFEB4B, IL19, KCTD5, PI3, PRKD2). Primary  
334 pulmonary hypertension (NPPB, NTproBNP, ROBO2, ENPEP, FGF23, LTBP2, SFRP1, ACP5, SPON1,  
335 CA4, SLC34A3, ACE2, AHSG, SERPINA7, SLC44A4, CDC123, SPINK8, LYPLA2, S100A3, MFAP4). Primary  
336 Malignancy Prostate (ADAMTS15, IL17A, INSL3, KLK3, LECT2, LTBP2, PRR5, SCARF2, SPINT3, TSPAN1).

337

338

339

340

341

342

343 **Acknowledgements**

344 All UK Biobank data was accessed in accordance with GlaxoSmithKline's UK Biobank Application  
345 #20361 and the UKB-PPP Consortium Application #65851. We would like to acknowledge the UK  
346 Biobank participants for their dedication to participating in ongoing research and electronic health  
347 record linkage. This work and the incredible work of other UK Biobank researchers would not have  
348 been possible without their dedication to science.

349 **Competing Interests**

350 J. Davitte, P. Surendran, D. Croteau-Chonka, C. Robins, T. Kanno, S. Gade, D. Freitag, F. Ziebell, J. Betts,  
351 and R. Scott are all employees of and/or shareholders for GlaxoSmithKline.

352

## 353 References

- 354 1. Bobrowska A, Murton M, Seedat F, et al. Targeted screening in the UK: A narrow concept with  
355 broad application. *Lancet Reg Health Eur* 2022;16:100353.
- 356 2. Goff DC, Jr., Lloyd-Jones DM, Bennett G, et al. 2013 ACC/AHA guideline on the assessment of  
357 cardiovascular risk: a report of the American College of Cardiology/American Heart Association Task  
358 Force on Practice Guidelines. *Circulation* 2014;129:S49-73.
- 359 3. Koshariar C, Oke J, Abel L, Nicholson BD, Ramasamy K, Van den Bruel A. Quantifying intervals  
360 to diagnosis in myeloma: a systematic review and meta-analysis. *BMJ Open* 2018;8:e019758.
- 361 4. Hoyer N, Prior TS, Bendstrup E, Shaker SB. Diagnostic delay in IPF impacts progression-free  
362 survival, quality of life and hospitalisation rates. *BMJ Open Respir Res* 2022;9.
- 363 5. Abo-Tabik M, Parisi R, Morgan C, et al. Mapping opportunities for the earlier diagnosis of  
364 psoriasis in primary care settings in the UK: results from two matched case-control studies. *Br J Gen  
365 Pract* 2022;72:e834-e41.
- 366 6. Helmrich I, Czeiter E, Amrein K, et al. Incremental prognostic value of acute serum biomarkers  
367 for functional outcome after traumatic brain injury (CENTER-TBI): an observational cohort study.  
368 *Lancet Neurol* 2022;21:792-802.
- 369 7. Williams SA, Kivimaki M, Langenberg C, et al. Plasma protein patterns as comprehensive  
370 indicators of health. *Nat Med* 2019;25:1851-7.
- 371 8. Torkamani A, Wineinger NE, Topol EJ. The personal and clinical utility of polygenic risk scores.  
372 *Nat Rev Genet* 2018;19:581-90.
- 373 9. Polygenic Risk Score Task Force of the International Common Disease A. Responsible use of  
374 polygenic risk scores in the clinic: potential benefits, risks and gaps. *Nat Med* 2021;27:1876-84.
- 375 10. Carrasco-Zanini J, Pietzner M, Lindbohm JV, et al. Proteomic signatures for identification of  
376 impaired glucose tolerance. *Nat Med* 2022;28:2293-300.
- 377 11. Gadd DA, Hillary RF, Kuncheva Z, et al. Blood protein levels predict leading incident diseases  
378 and mortality in UK Biobank. *medRxiv* 2023:2023.05.01.23288879.
- 379 12. Ho JE, Lyass A, Courchesne P, et al. Protein Biomarkers of Cardiovascular Disease and Mortality  
380 in the Community. *J Am Heart Assoc* 2018;7.
- 381 13. Williams SA, Ostroff R, Hinterberg MA, et al. A proteomic surrogate for cardiovascular  
382 outcomes that is sensitive to multiple mechanisms of change in risk. *Sci Transl Med* 2022;14:eabj9625.
- 383 14. Sinnott-Armstrong N, Tanigawa Y, Amar D, et al. Genetics of 35 blood and urine biomarkers in  
384 the UK Biobank. *Nat Genet* 2021;53:185-94.
- 385 15. Vuckovic D, Bao EL, Akbari P, et al. The Polygenic and Monogenic Basis of Blood Traits and  
386 Diseases. *Cell* 2020;182:1214-31 e11.
- 387 16. Stekhoven DJ, Buhlmann P. MissForest--non-parametric missing value imputation for mixed-  
388 type data. *Bioinformatics* 2012;28:112-8.
- 389 17. Wik L, Nordberg N, Broberg J, et al. Proximity Extension Assay in Combination with Next-  
390 Generation Sequencing for High-throughput Proteome-wide Analysis. *Mol Cell Proteomics*  
391 2021;20:100168.
- 392 18. Zhong W, Edfors F, Gummesson A, Bergstrom G, Fagerberg L, Uhlen M. Next generation plasma  
393 proteome profiling to monitor health and disease. *Nat Commun* 2021;12:2493.
- 394 19. Sun BB, Chiou J, Traylor M, et al. Genetic regulation of the human plasma proteome in 54,306  
395 UK Biobank participants. *bioRxiv* 2022:2022.06.17.496443.
- 396 20. Kuan V, Denaxas S, Gonzalez-Izquierdo A, et al. A chronological map of 308 physical and mental  
397 health conditions from 4 million individuals in the English National Health Service. *Lancet Digit Health*  
398 2019;1:e63-e77.
- 399 21. Nicola Lunardon, Giovanna Menardi, Torelli N. ROSE: a Package for Binary Imbalanced  
400 Learning. *The R Journal* 2014;6:78-9.

- 401 22. Thompson DJ, Wells D, Selzam S, et al. UK Biobank release and systematic evaluation of  
402 optimised polygenic risk scores for 53 diseases and quantitative traits. medRxiv  
403 2022:2022.06.16.22276246.
- 404 23. Zingone A, Kuehl WM. Pathogenesis of monoclonal gammopathy of undetermined significance  
405 and progression to multiple myeloma. *Semin Hematol* 2011;48:4-12.
- 406 24. Visram A, Soof C, Rajkumar SV, et al. Serum BCMA levels predict outcomes in MGUS and  
407 smoldering myeloma patients. *Blood Cancer J* 2021;11:120.
- 408 25. Ganz P, Heidecker B, Hveem K, et al. Development and Validation of a Protein-Based Risk Score  
409 for Cardiovascular Outcomes Among Patients With Stable Coronary Heart Disease. *JAMA*  
410 2016;315:2532-41.
- 411 26. Pinsky PF, Parnes H. Screening for Prostate Cancer. *New England Journal of Medicine*  
412 2023;388:1405-14.
- 413 27. Tai YT, Acharya C, An G, et al. APRIL and BCMA promote human multiple myeloma growth and  
414 immunosuppression in the bone marrow microenvironment. *Blood* 2016;127:3225-36.
- 415 28. Shen X, Guo Y, Qi J, Shi W, Wu X, Ju S. Binding of B-cell maturation antigen to B-cell activating  
416 factor induces survival of multiple myeloma cells by activating Akt and JNK signaling pathways. *Cell*  
417 *Biochem Funct* 2016;34:104-10.
- 418 29. van de Donk N, Usmani SZ, Yong K. CAR T-cell therapy for multiple myeloma: state of the art  
419 and prospects. *Lancet Haematol* 2021;8:e446-e61.
- 420 30. Moreau P, Garfall AL, van de Donk N, et al. Teclistamab in Relapsed or Refractory Multiple  
421 Myeloma. *N Engl J Med* 2022;387:495-505.
- 422 31. Raje N, Berdeja J, Lin Y, et al. Anti-BCMA CAR T-Cell Therapy bb2121 in Relapsed or Refractory  
423 Multiple Myeloma. *N Engl J Med* 2019;380:1726-37.
- 424 32. Mikkilineni L, Kochenderfer JN. CAR T cell therapies for patients with multiple myeloma. *Nat*  
425 *Rev Clin Oncol* 2021;18:71-84.
- 426 33. Sammartano V, Franceschini M, Fredducci S, et al. Anti-BCMA novel therapies for multiple  
427 myeloma. *Cancer Drug Resist* 2023;6:169-81.
- 428 34. Garfall AL, Cohen AD, Susanibar-Adaniya SP, et al. Anti-BCMA/CD19 CAR T Cells with Early  
429 Immunomodulatory Maintenance for Multiple Myeloma Responding to Initial or Later-Line Therapy.  
430 *Blood Cancer Discov* 2023;4:118-33.
- 431 35. Guenther A, Krauss E, Tello S, et al. The European IPF registry (eurIPFreg): baseline  
432 characteristics and survival of patients with idiopathic pulmonary fibrosis. *Respir Res* 2018;19:141.
- 433 36. Maher TM, Strek ME. Antifibrotic therapy for idiopathic pulmonary fibrosis: time to treat.  
434 *Respir Res* 2019;20:205.
- 435 37. Harakalova M, Kummeling G, Sammani A, et al. A systematic analysis of genetic dilated  
436 cardiomyopathy reveals numerous ubiquitously expressed and muscle-specific genes. *Eur J Heart Fail*  
437 2015;17:484-93.
- 438 38. Sweet M, Taylor MR, Mestroni L. Diagnosis, prevalence, and screening of familial dilated  
439 cardiomyopathy. *Expert Opin Orphan Drugs* 2015;3:869-76.
- 440 39. Duan S, Rico K, Merchant JL. Gastrin: From Physiology to Gastrointestinal Malignancies.  
441 *Function (Oxf)* 2022;3:zqab062.
- 442 40. Buergel T, Steinfeldt J, Ruyoga G, et al. Metabolomic profiles predict individual multidisease  
443 outcomes. *Nat Med* 2022;28:2309-20.
- 444 41. Fry A, Littlejohns TJ, Sudlow C, et al. Comparison of Sociodemographic and Health-Related  
445 Characteristics of UK Biobank Participants With Those of the General Population. *Am J Epidemiol*  
446 2017;186:1026-34.

447
